# Supplementary material for: p53 Regulates Cell Cycle and MicroRNAs to Promote Differentiation of Human Embryonic Stem Cells
Source: PubMed Central journal article supplement (PMC3289600; doi:10.1371/journal.pbio.1001268), 2012-02-28

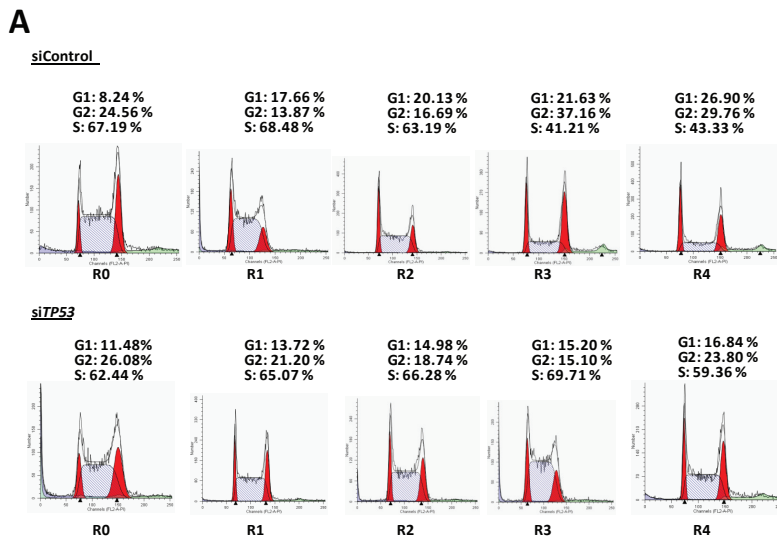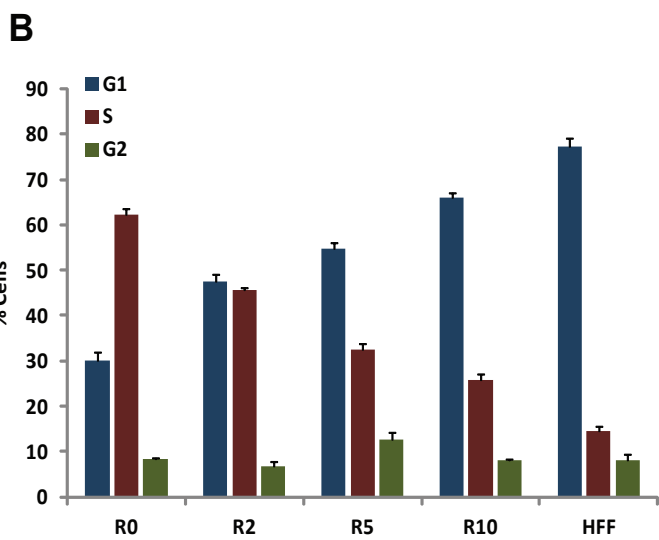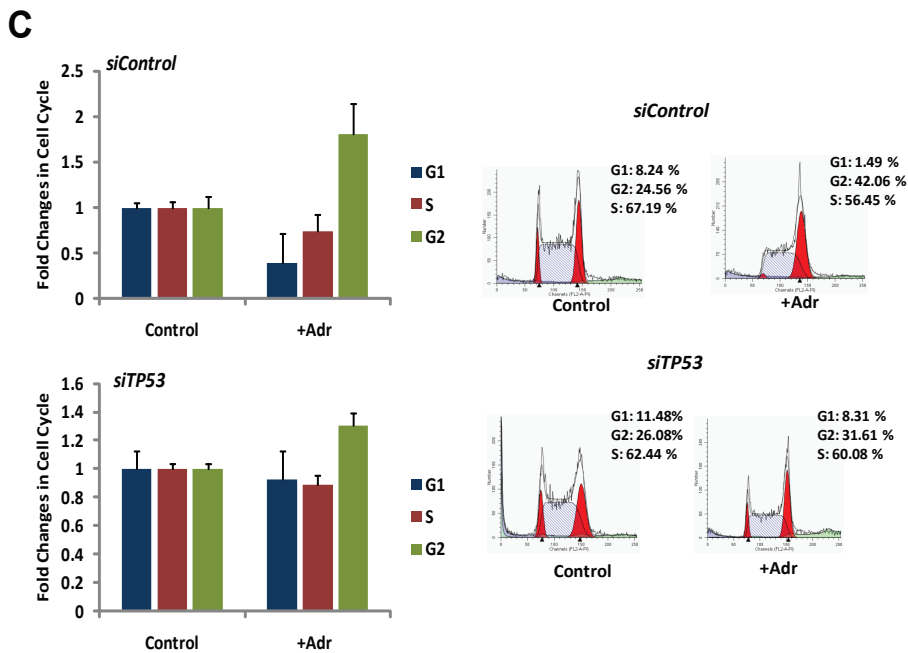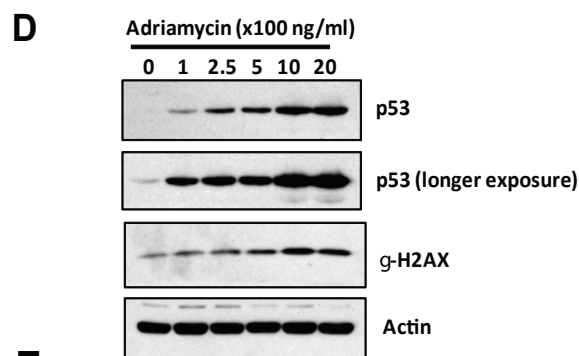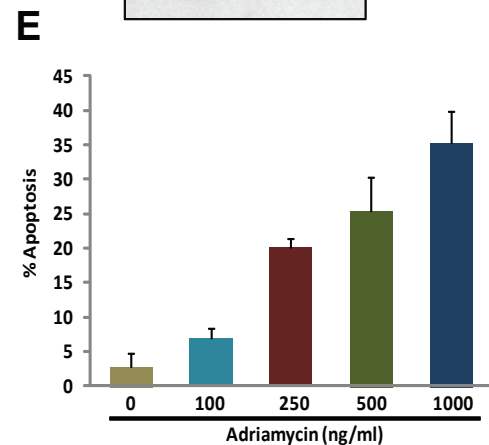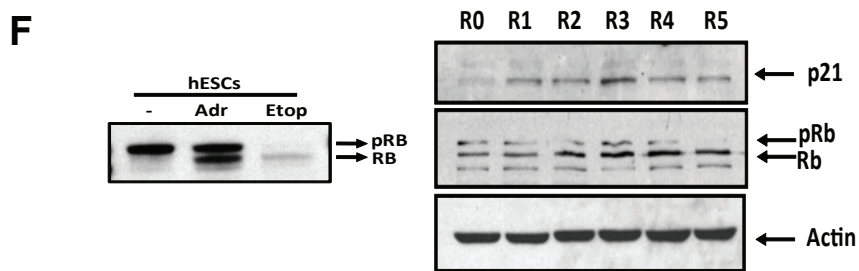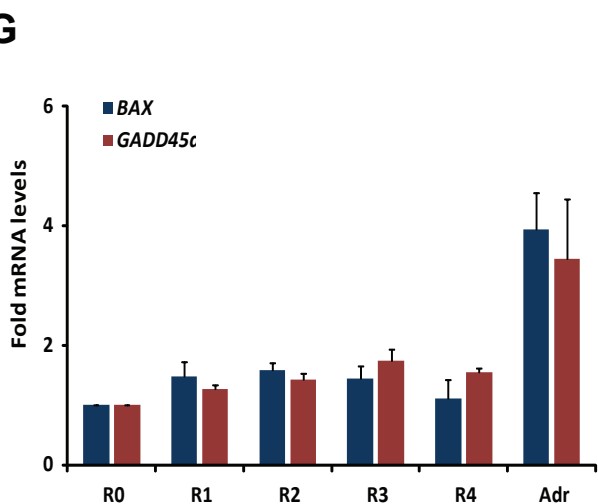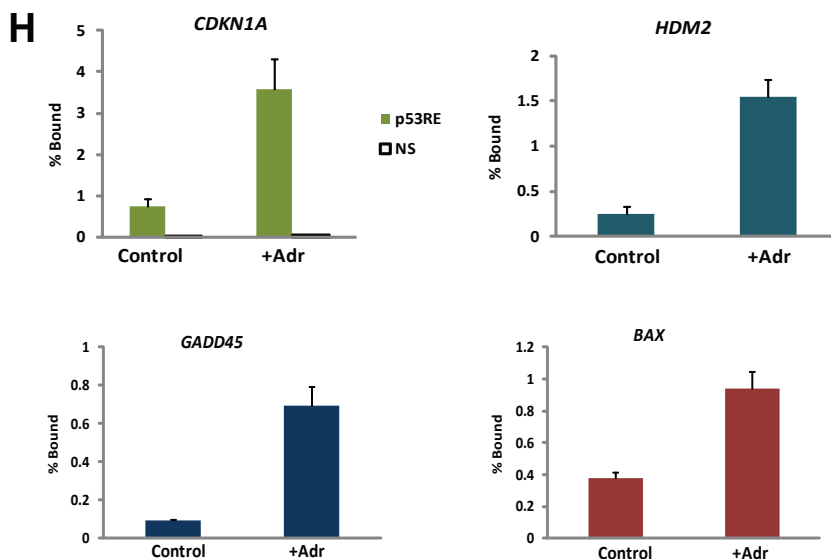

Supplement: pbio.1001268.s004.pdf [file pbio.1001268.s004.pdf]
